# Supplementary material for: Procollagen C-Endopeptidase Enhancer 2 Secreted by Tonsil-Derived Mesenchymal Stem Cells Increases the Oxidative Burst of Promyelocytic HL-60 Cells
Source: MDPI journal article supplement (doi:10.3390/biology11020255), 2022-02-07
Supplement: s1 [file s1]

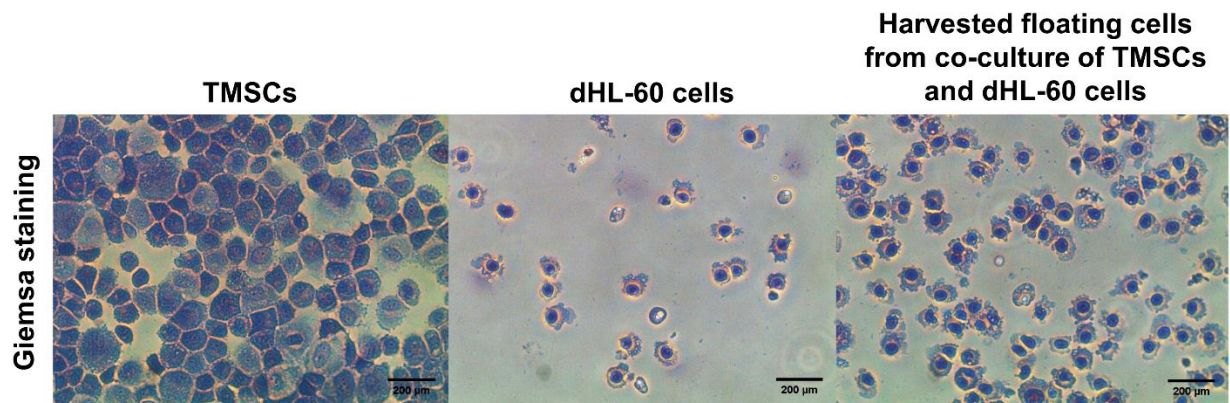

Supplementary Figure S1. The floating cells in the supernatant of co-cultured tonsil-derived mesenchymal stem cells (TMSCs) and differentiated HL-60 (dHL-60) cells are mostly dHL-60 cells. Giemsa staining was shown to demonstrate the morphology of the harvested floating cells from the co-culture of TMSCs and dHL-60 cells. Image magnification, 200 $\times$ . Scale bars, 200  $\mu$ m.

### A. PCOLCE2

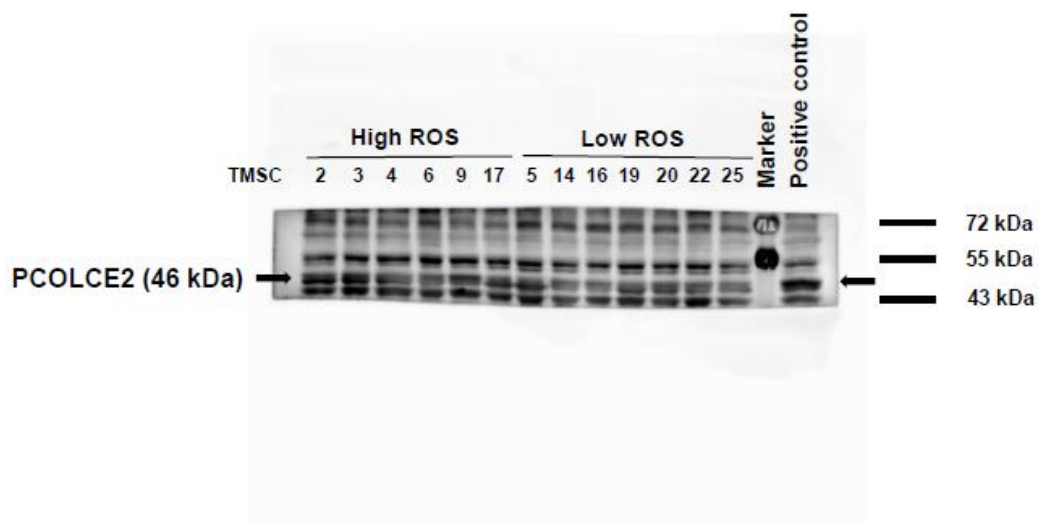

### B. Tubulin

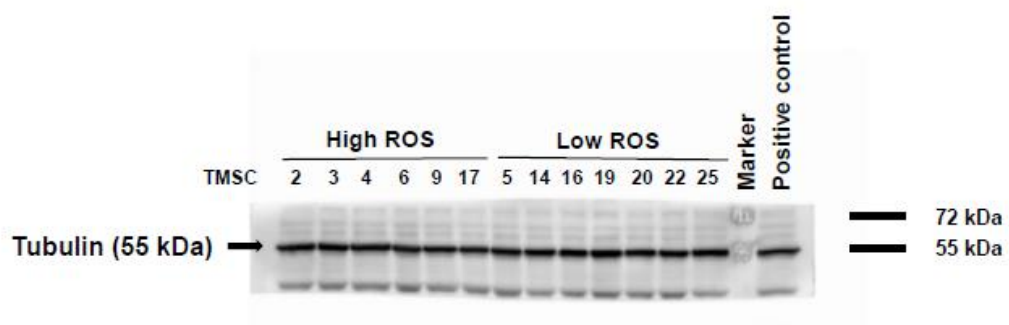

### C. PCOLCE2

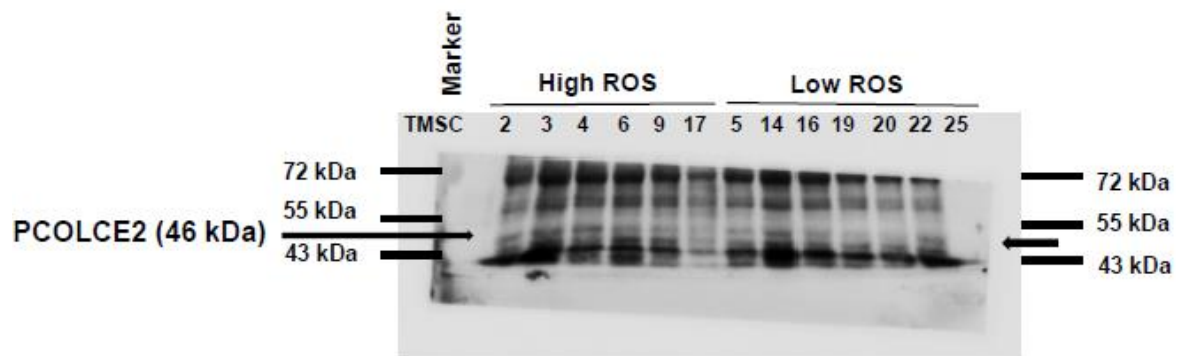

### D. Ponceau

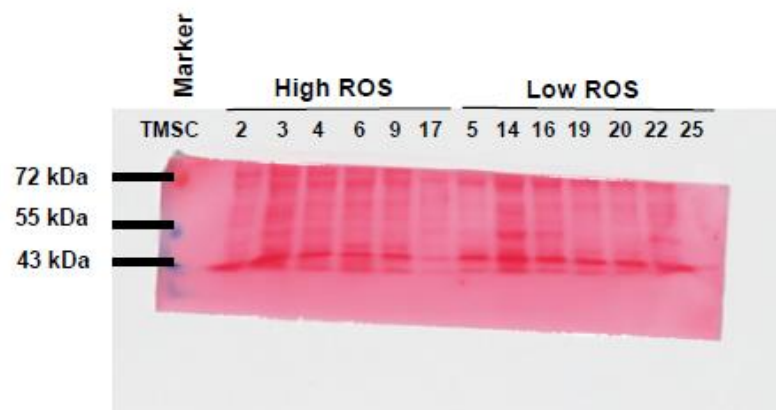

Supplementary Figure S2. Full Western Blot of Figure 3D,E.

Supplementary Table S1. Primers used in real-time PCR.

| Gene         | Primer sequence (5'-3')    | Reference |
|--------------|----------------------------|-----------|
| <i>GAPDH</i> | F: ACACCCACTCCTCCACCTTT    | [1]       |
|              | R: TGCTGTAGCCAAATTCGTTG    |           |
| <i>SFRP4</i> | F: ACGAGCTGCCTGTCTATGAC    |           |
|              | R: TGTCTGGTGTGATGTCTATCCAC |           |
| <i>MEDAG</i> | F: TGAGCCTTTAATCCGAAGGA    |           |
|              | R: TGATCTGGGTGACAGATTGC    |           |

|                |                                                       |
|----------------|-------------------------------------------------------|
| <i>MFAP5</i>   | F:GGGTCAATAGTCAACGAGGAGA<br>R:CTGTAGCGGGATCATTACCA    |
| <i>PCOLCE2</i> | F:GCAGTGAAGGTTTTCTGGAGTG<br>R:AGTCATAGCGGCACAGGTTGTC  |
| <i>APCDD1</i>  | F:CACAGTGCCATCACATGCTCA<br>R:AGTGGCCCTCGATTGTAGGT     |
| <i>COL8A1</i>  | F:GGGAGTGCTGCTTACCATTC<br>R:AGCGGCTTGATCCCATAGTAG     |
| <i>PSG1</i>    | F:CTAACCCACCGGCACAGTAT<br>R:AGAGCCCGCTATGCTTTGTA      |
| <i>PDPN</i>    | F:AACCAGCGAAGACCGCTATAA<br>R:CGAATGCCTGTTACACTGTTGA   |
| <i>SNAP25</i>  | F:ACCAGTTGGCTGATGAGTCG<br>R:CAAAGTCCTGATACCAGCATCTT   |
| <i>RUNX3</i>   | F:GCGAGGGAAGAGTTTCACCC<br>R:TTGATGGCTCGGTGGTAGGT      |
| <i>PADI4</i>   | F:GGGGTGGTCGTGGATATTGC<br>R:CCCGGTGAGGTAGAGTAGAGC     |
| <i>MAP2K2</i>  | F:CCAAGGTCGGCGAACTCAAA<br>R:TCTCAAGGTGGATCAGCTTCC     |
| <i>MAPK3</i>   | F:CTACACGCAGTTGCAGTACAT<br>R:CAGCAGGATCTGGATCTCCC     |
| <i>RAF1</i>    | F:CCGAACAAGCAAAGAACAGTG<br>R:GACGCAGCATCAGTATTCCAAT   |
| <i>RAC2</i>    | F:CAACGCCTTTCCCGGAGAG<br>R:TCCGTCTGTGGATAGGAGAGC      |
| <i>PTK2</i>    | F:CTTCAAACCTGGTCAAATGCACTG<br>R:CTCAGCCCATAGCACTCAGC  |
| <i>NOX1</i>    | F:GCACACCTGTTTAACTTTGACTG<br>R:GGACTGGATGGGATTTAGCCA  |
| <i>NOX2</i>    | F:ACCGGGTTTATGATATTCCACCT<br>R:GATTTGACAGACTGGCAAGA   |
| <i>NOX3</i>    | F:CGTGGCGCATTTCTTCAACC<br>R:GCTCTCGTTAGGGGTGTTGC      |
| <i>NOX4</i>    | F:CAGATGTTGGGGCTAGGATTG<br>R:GAGTGTTCCGGCACATGGGTA    |
| <i>NOX5</i>    | F:ACTCAGCAGTTTAAAGACCATTGC<br>R:GGACTCTTTCACATGCAGAGC |
| <i>DUOX1</i>   | F:GCAGCGATTTGATGGGTGGTA<br>R:AGGTGGGGTTCTCCCAAGG      |
| <i>DUOX2</i>   | F:ACGGTGTGTATCAGGCTCTG<br>R:CACGTCGGAAAGAACATGGTAG    |

---

## References

1. Ryu, K.H.; Kim, S.Y.; Kim, Y.R.; Woo, S.Y.; Sung, S.H.; Kim, H.S.; Jung, S.C.; Jo, I.; Park, J.W. Tonsil-derived mesenchymal stem cells alleviate concanavalin A-induced acute liver injury. *Exp Cell Res* **2014**, *326*, 143-154, doi:10.1016/j.yexcr.2014.06.007.
